# Supplementary material for: A supramolecular copolymer based on small molecules, used for a multifunctional adhesive and rapid hemostasis
Source: Royal Society of Chemistry journal article supplement (doi:10.1039/d0py00926a), 2020-01-01
Supplement: d0py00926a1.pdf [file d0py00926a1.pdf]

## Supplementary Information

### **Supramolecular copolymer based on small molecule, used for multifunctional adhesive and rapid hemostasis**

Junying Chen<sup>a</sup>, Dawei Guo<sup>c</sup>, Shihao Liang<sup>d</sup>, Zuozhen Liu<sup>a,b,\*</sup>

<sup>a</sup>Key Laboratory for Specially Functional Polymers and Related Technology of Ministry of Education, School of Materials Science and Engineering, East China University of Science and Technology, Shanghai 200237, China

<sup>b</sup>Shanghai Engineering Research Center of New anticorrosion Material, Sino Polymer Co., Ltd., Shanghai 200237, China

<sup>c</sup>Wuhan University of Science and Technology, Wuhan 430081, China

<sup>d</sup>Shengda University, Zhengzhou 451191, China

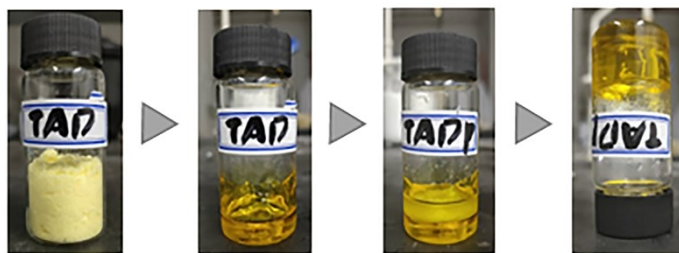

**Figure S1.** Powdery solid, heated liquid and gelled glue after cooling.

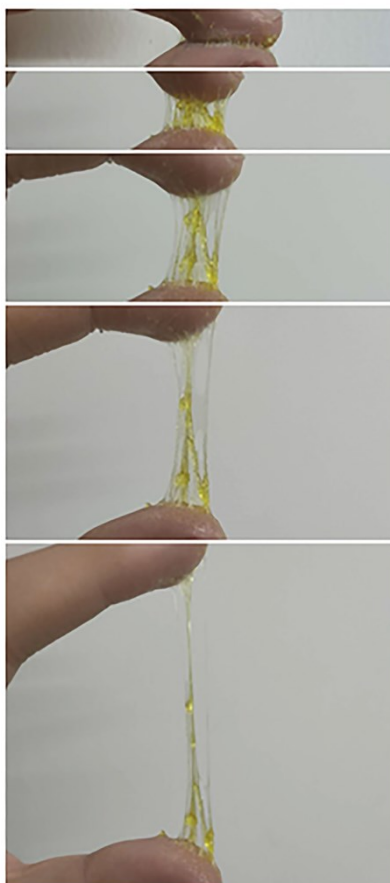

**Figure S2.** The copolymer can be drawn into filaments.

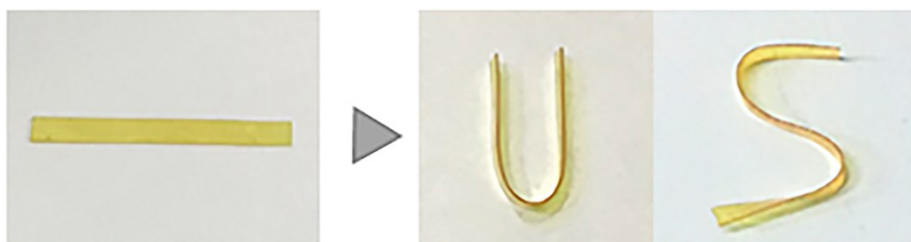

**Figure S3.** Strip copolymers can be used to construct objects of different shapes.

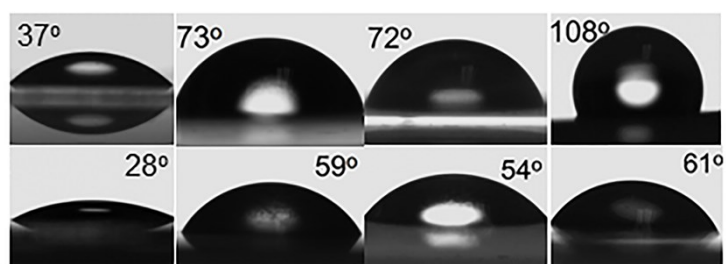

**Figure S4.** Contact angles of water (first row) and melted TADP adhesive (second row) on different substrates (the substrates are, respectively, glass, iron sheet, PMMA and PTFE from left to right).

**Table S1.** Characterization of different TADP polymers.

|               | <b>TAD<br/>(g)</b> | <b>PEGDA<br/>(g)</b> | <b>T<sub>m</sub><sup>a</sup><br/>(°C)</b> |
|---------------|--------------------|----------------------|-------------------------------------------|
| <b>TADP10</b> | 10                 | 1                    | 69.3°C                                    |
| <b>TADP20</b> | 10                 | 2                    | 62.5°C                                    |
| <b>TADP30</b> | 10                 | 3                    | 53.7 °C                                   |
| <b>TADP40</b> | 10                 | 4                    | 39.7°C                                    |

a) Melting temperature.

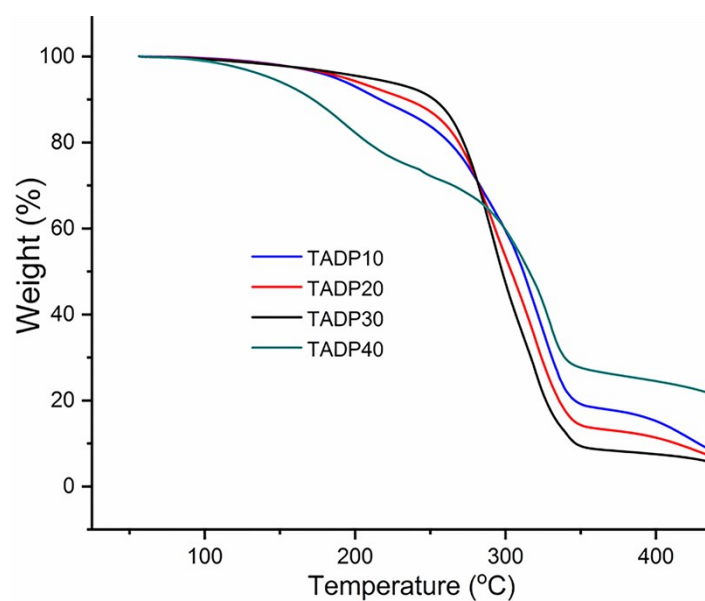

**Figure S5.** Thermal decomposition behavior of TA and TAN.

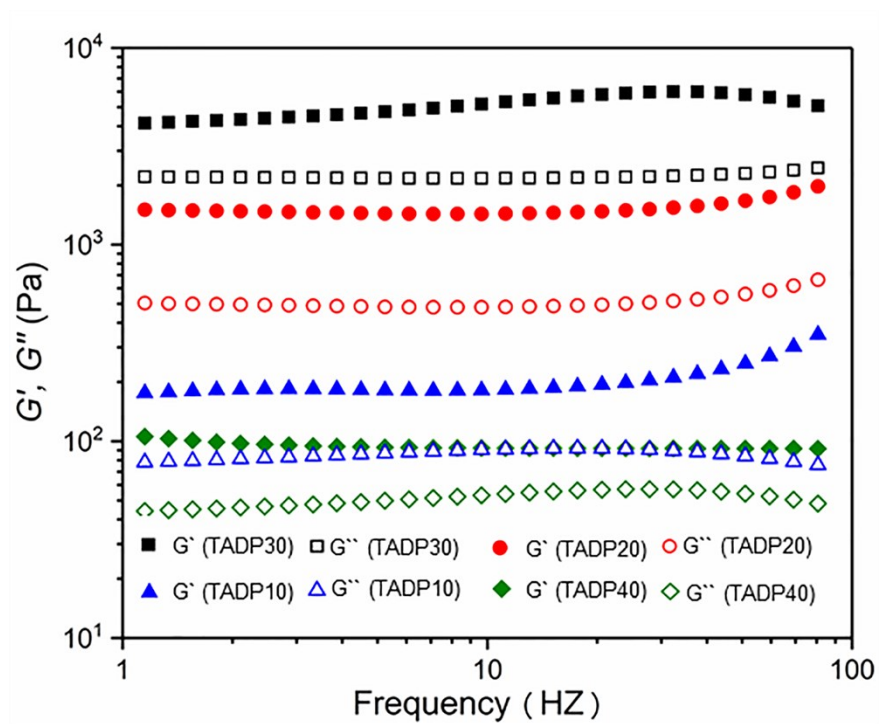

**Figure S6.** Frequency dependency of storage (solid dots,  $G'$ ) and loss (hollow dots,  $G''$ ) moduli of copolymer network.

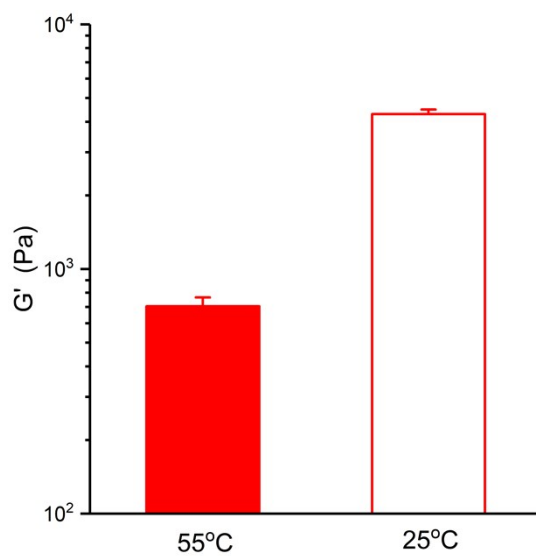

**Fig. S7.** Changes in storage modulus ( $G'$ ) of the TADp30 at 55 or 25 °C.

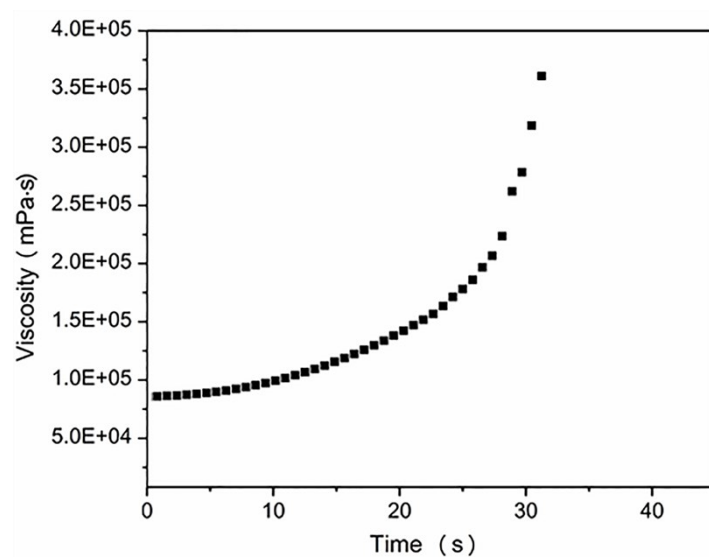

**Figure S8.** Time course of viscosity after dropping the temperature from 55 °C to 25 °C for TADP30.

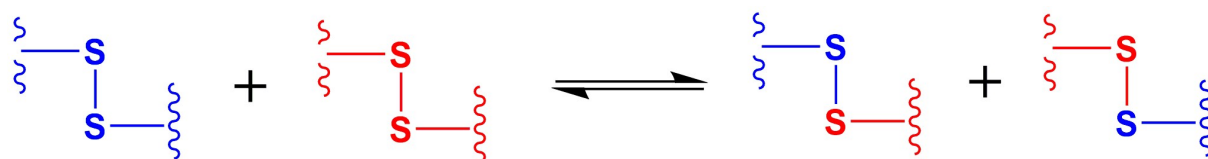

**Figure S9.** Exchange of disulfides in the polymer backbone.
